# Supplementary material
Source: HighWire-hosted journal article supplement (https://bmjopen.bmj.com/content/13/3/e068849)
Supplement: inline-supplementary-material-1 [file inline-supplementary-material-1.pdf]

Supplementary

Table 1. Mean survival time by comorbidity group and no comorbidity group and the Log Rank test for comparison.

| Mean <sup>a</sup> |          |            |                         |             |
|-------------------|----------|------------|-------------------------|-------------|
| Status            | Estimate | Std. Error | 95% Confidence Interval |             |
|                   |          |            | Lower Bound             | Upper Bound |
| comorbidity       | 19.691   | .572       | 18.570                  | 20.813      |
| No comorbidity    | 27.073   | .495       | 26.104                  | 28.043      |
| Overall           | 22.976   | .470       | 22.055                  | 23.896      |

Overall Comparisons

|                       | Chi-Square | df | Sig. |
|-----------------------|------------|----|------|
| Log Rank (Mantel-Cox) | 38.367     | 1  | .000 |

Table 2. Mean survival time by patients with ≥2 comorbidities and patients with one comorbidity and the Log Rank test for comparison.

| Mean <sup>a</sup> |          |            |                         |             |
|-------------------|----------|------------|-------------------------|-------------|
| status            | Estimate | Std. Error | 95% Confidence Interval |             |
|                   |          |            | Lower Bound             | Upper Bound |
| ≥2 comorbidities  | 17.313   | .843       | 15.660                  | 18.965      |
| One comorbidity   | 22.482   | .700       | 21.109                  | 23.855      |
| Overall           | 19.691   | .572       | 18.570                  | 20.813      |

Overall Comparisons

|                       | Chi-Square | df | Sig. |
|-----------------------|------------|----|------|
| Log Rank (Mantel-Cox) | 21.297     | 1  | .000 |

Table 3. Mean survival time by patients with hypertension and patients with other types of comorbidity and the Log Rank test for comparison.

| Status              | Mean <sup>a</sup> |            |                         |             |
|---------------------|-------------------|------------|-------------------------|-------------|
|                     | Estimate          | Std. Error | 95% Confidence Interval |             |
|                     |                   |            | Lower Bound             | Upper Bound |
| Hypertension        | 17.638            | .777       | 16.115                  | 19.160      |
| Other comorbidities | 21.549            | .768       | 20.045                  | 23.054      |
| Overall             | 19.691            | .572       | 18.570                  | 20.813      |

#### Overall Comparisons

|                       | Chi-Square | df | Sig. |
|-----------------------|------------|----|------|
| Log Rank (Mantel-Cox) | 8.339      | 1  | .004 |

Table 4. Mean survival time by patients with Diabetes mellitus and patients with other types of comorbidity and the Log Rank test for comparison.

| Status              | Mean <sup>a</sup> |            |                         |             |
|---------------------|-------------------|------------|-------------------------|-------------|
|                     | Estimate          | Std. Error | 95% Confidence Interval |             |
|                     |                   |            | Lower Bound             | Upper Bound |
| Diabetes Mellitus   | 18.498            | .924       | 16.686                  | 20.309      |
| Other comorbidities | 20.548            | .723       | 19.131                  | 21.965      |
| Overall             | 19.691            | .572       | 18.570                  | 20.813      |

#### Overall Comparisons

|                       | Chi-Square | df | Sig. |
|-----------------------|------------|----|------|
| Log Rank (Mantel-Cox) | 3.267      | 1  | .071 |

Table 5. Mean survival time by patients with COPD and patients with other types of comorbidity and the Log Rank test for comparison.

| Status              | Mean <sup>a</sup> |            | 95% Confidence Interval |             |
|---------------------|-------------------|------------|-------------------------|-------------|
|                     | Estimate          | Std. Error | Lower Bound             | Upper Bound |
| COPD                | 10.975            | 1.347      | 8.335                   | 13.614      |
| Other comorbidities | 20.350            | .586       | 19.201                  | 21.965      |
| Overall             | 19.691            | .572       | 18.570                  | 20.813      |

**Overall Comparisons**

|                       | Chi-Square | df | Sig. |
|-----------------------|------------|----|------|
| Log Rank (Mantel-Cox) | 16.849     | 1  | .000 |

Table 6. Mean survival time by patients with Malignancy and patients with other types of comorbidity and the Log Rank test for comparison.

| Status              | Mean <sup>a</sup> |            | 95% Confidence Interval |             |
|---------------------|-------------------|------------|-------------------------|-------------|
|                     | Estimate          | Std. Error | Lower Bound             | Upper Bound |
| Malignancy          | 14.503            | 1.908      | 10.764                  | 18.242      |
| Other comorbidities | 20.255            | .591       | 19.097                  | 21.414      |
| Overall             | 19.691            | .572       | 18.570                  | 20.813      |

**Overall Comparisons**

|                       | Chi-Square | df | Sig. |
|-----------------------|------------|----|------|
| Log Rank (Mantel-Cox) | 11.331     | 1  | .001 |

Table 7. Mean survival time by patients with Obesity and patients with other types of comorbidity and the Log Rank test for comparison.

| Mean <sup>a</sup>     |          |            |                         |             |
|-----------------------|----------|------------|-------------------------|-------------|
| Status                | Estimate | Std. Error | 95% Confidence Interval |             |
|                       |          |            | Lower Bound             | Upper Bound |
| Obesity               | 13.623   | 1.583      | 10.521                  | 16.725      |
| Other comorbidities   | 20.413   | .593       | 19.251                  | 21.575      |
| Overall               | 19.691   | .572       | 18.570                  | 20.813      |
| Overall Comparisons   |          |            |                         |             |
|                       |          | Chi-Square | df                      | Sig.        |
| Log Rank (Mantel-Cox) |          | 12.760     | 1                       | .000        |
